# Supplementary material for: Protein synthesis is associated with high-speed dynamics and broad-band stability of functional hubs in the brain
Source: PubMed Central journal article supplement (PMC5519503; doi:10.1016/j.neuroimage.2017.04.062), 2017-07-15

Freesurfer (Desikan-Kilaney)

82 ROIs

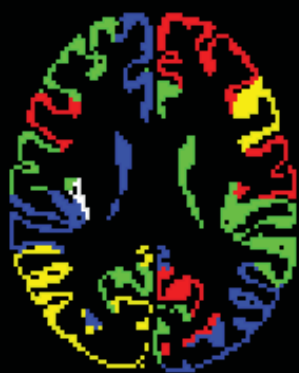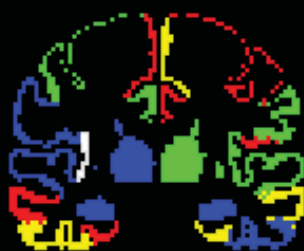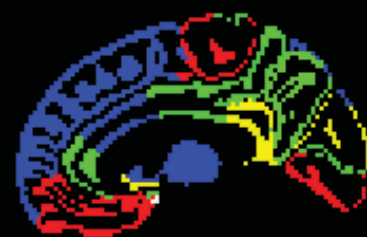

---

Automated Anatomical labeling (AAL)

67 ROIs

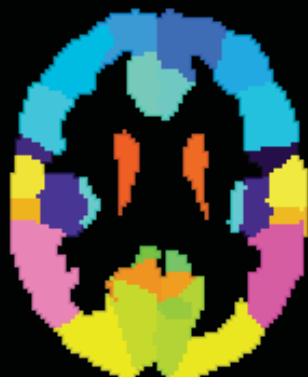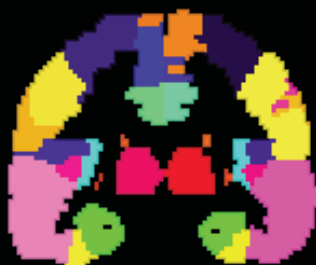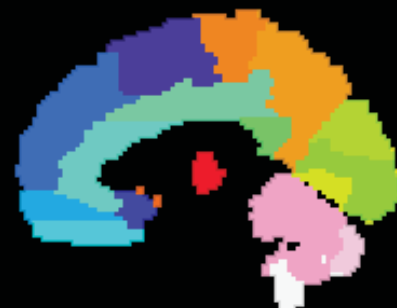

---

Craddock 200

200 ROIs

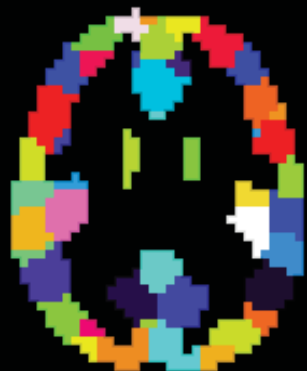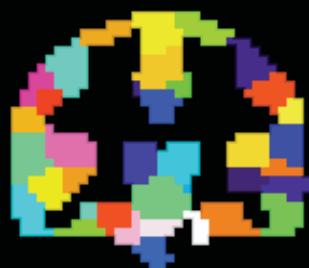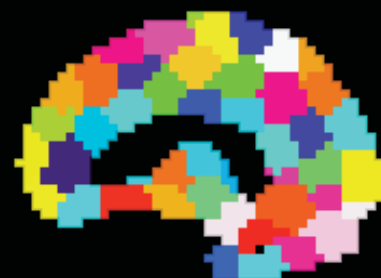

Automated Anatomical Labeling (AAL)

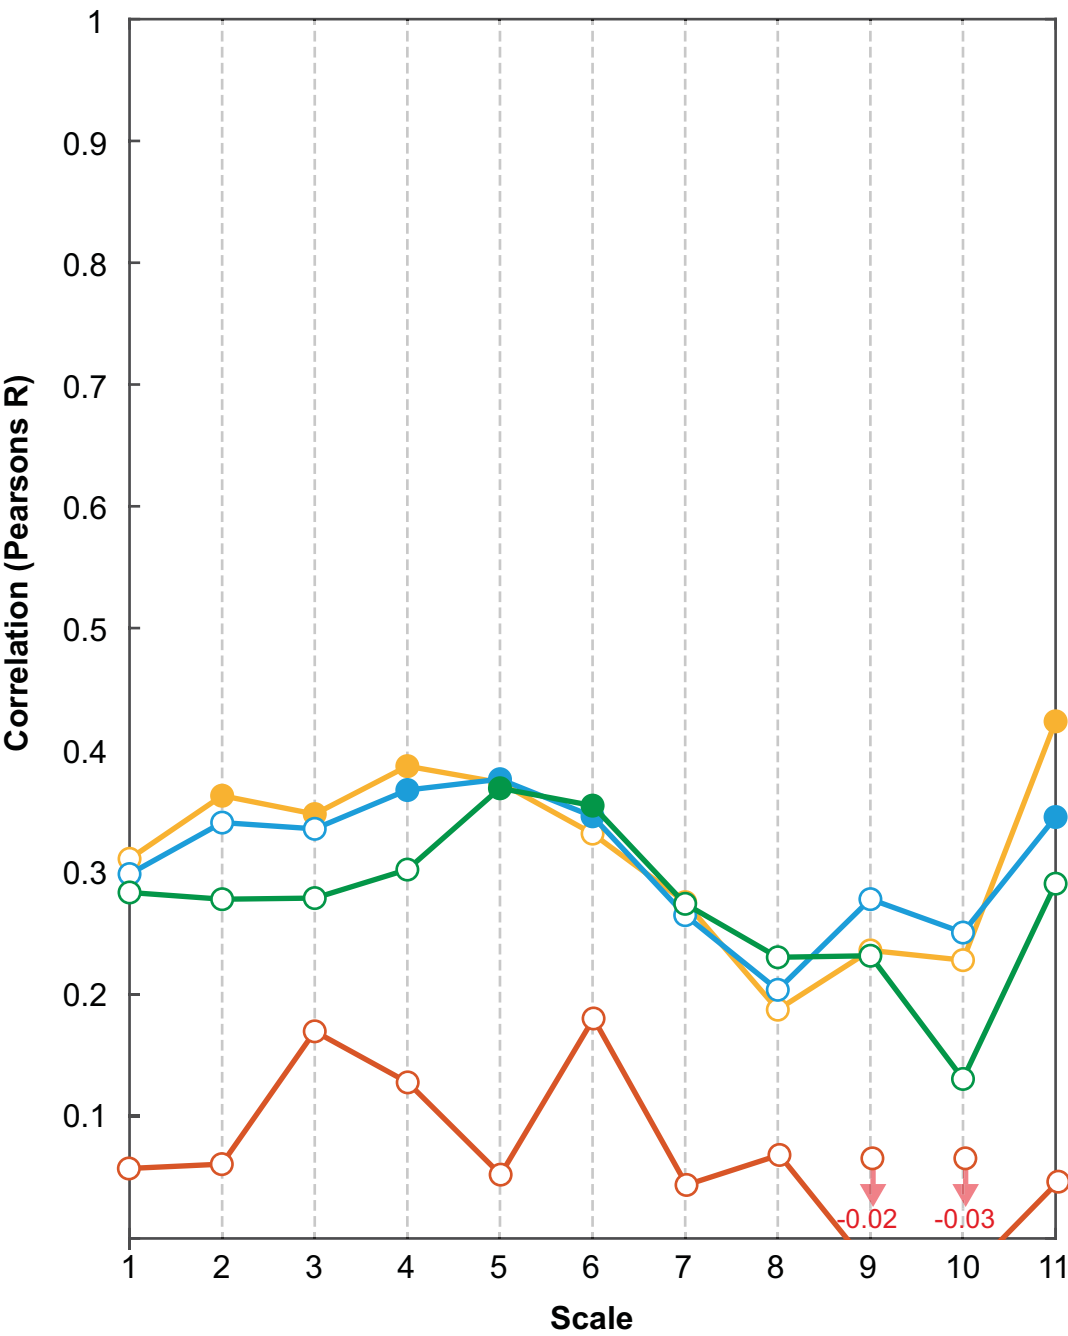

Craddock 200

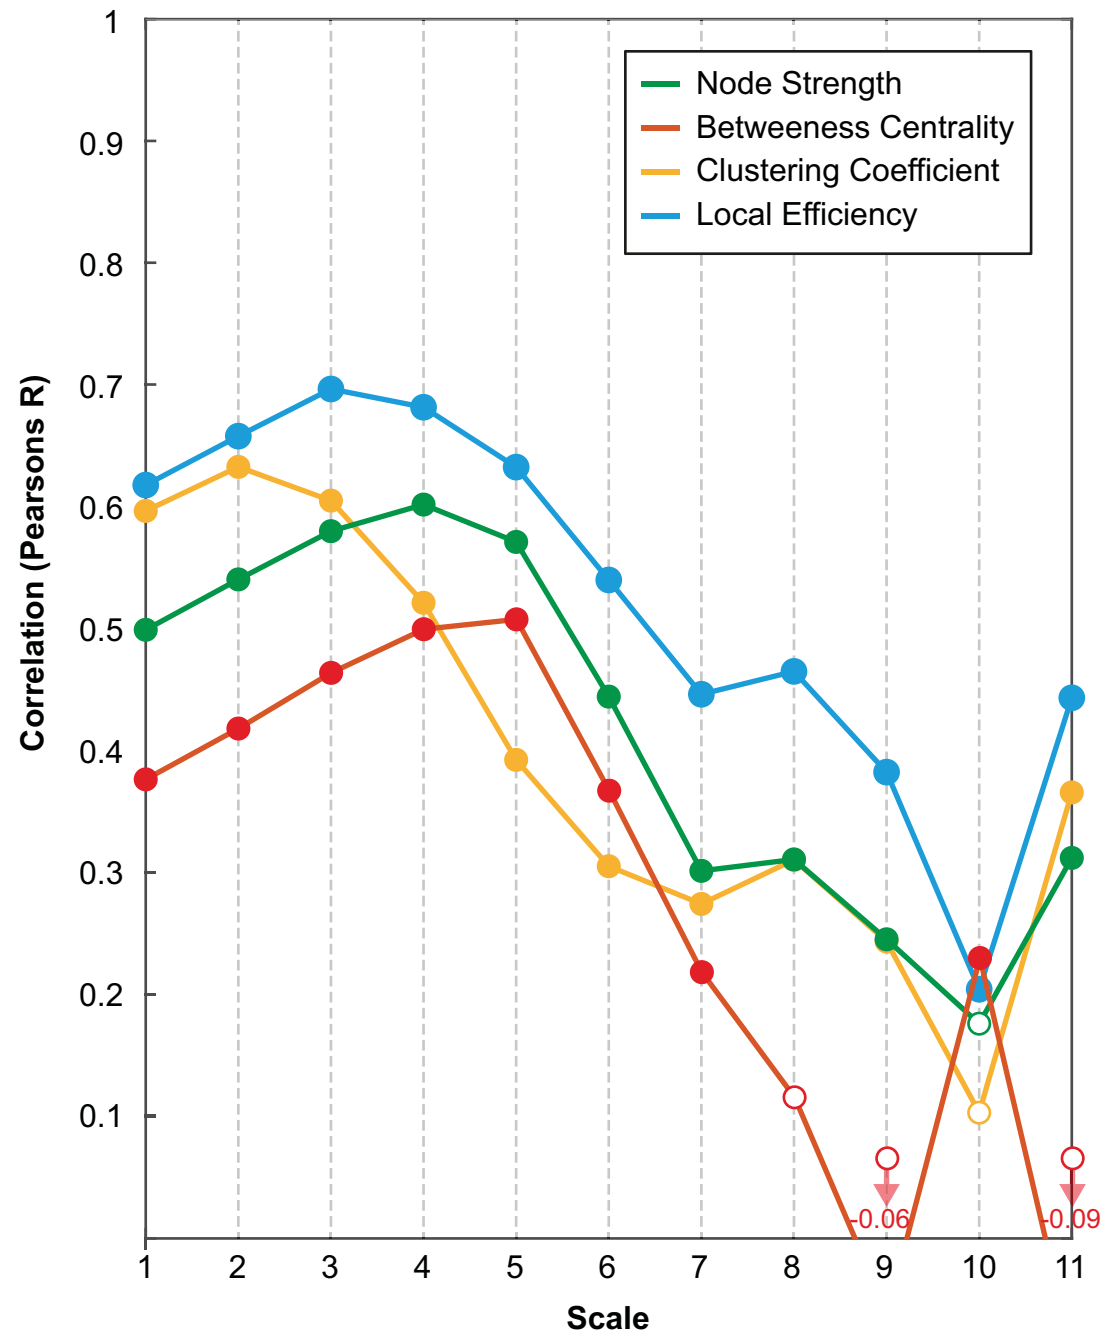

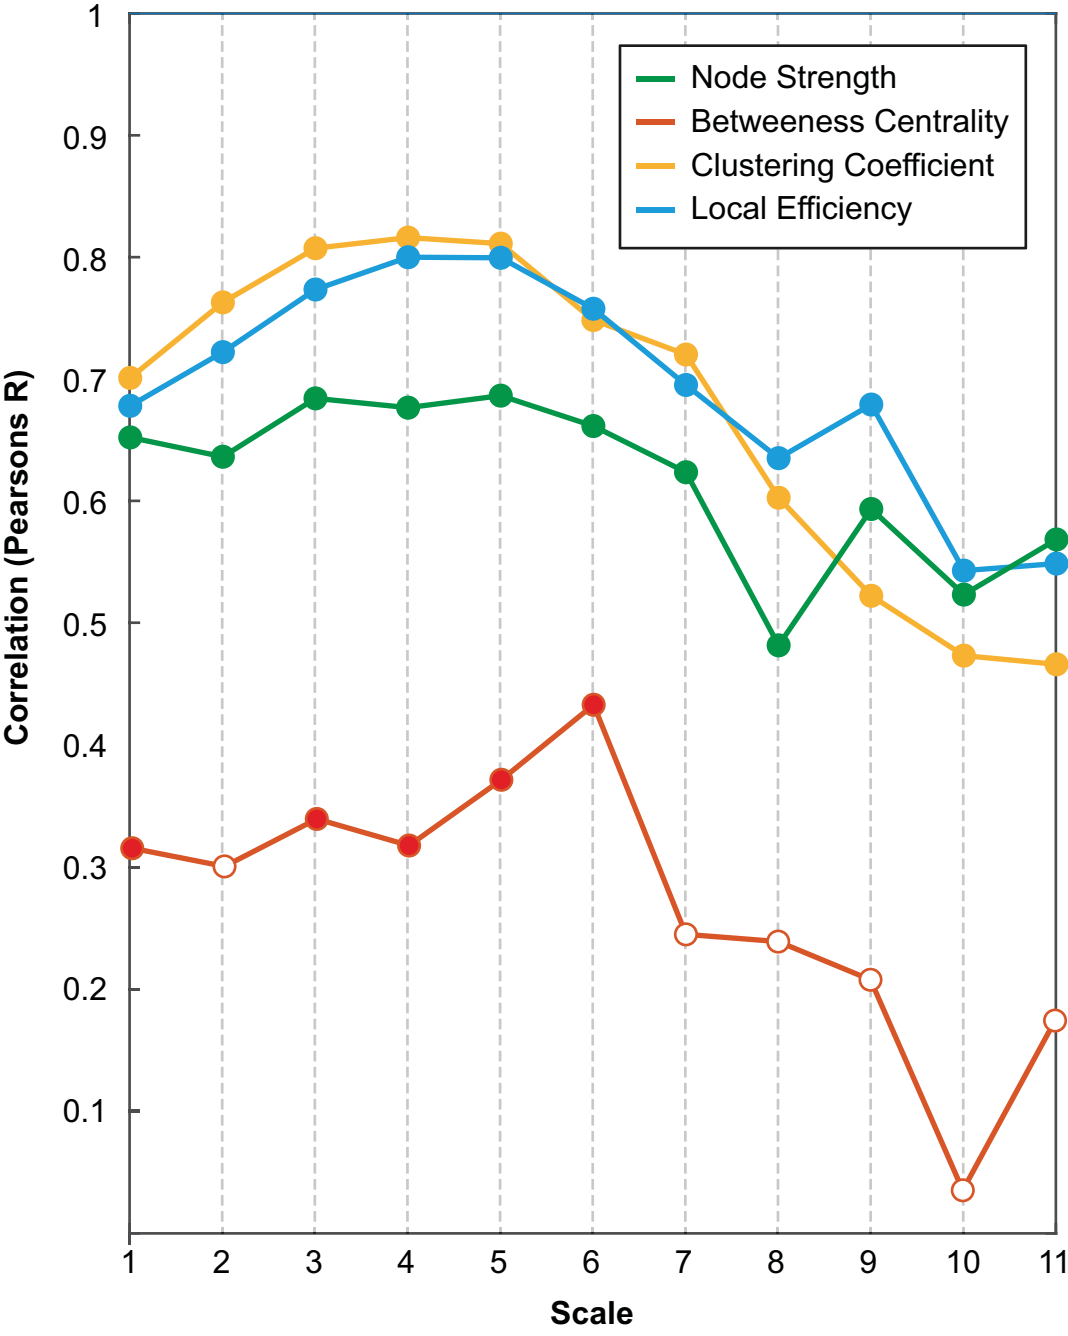

Automated Anatomical Labeling (AAL)

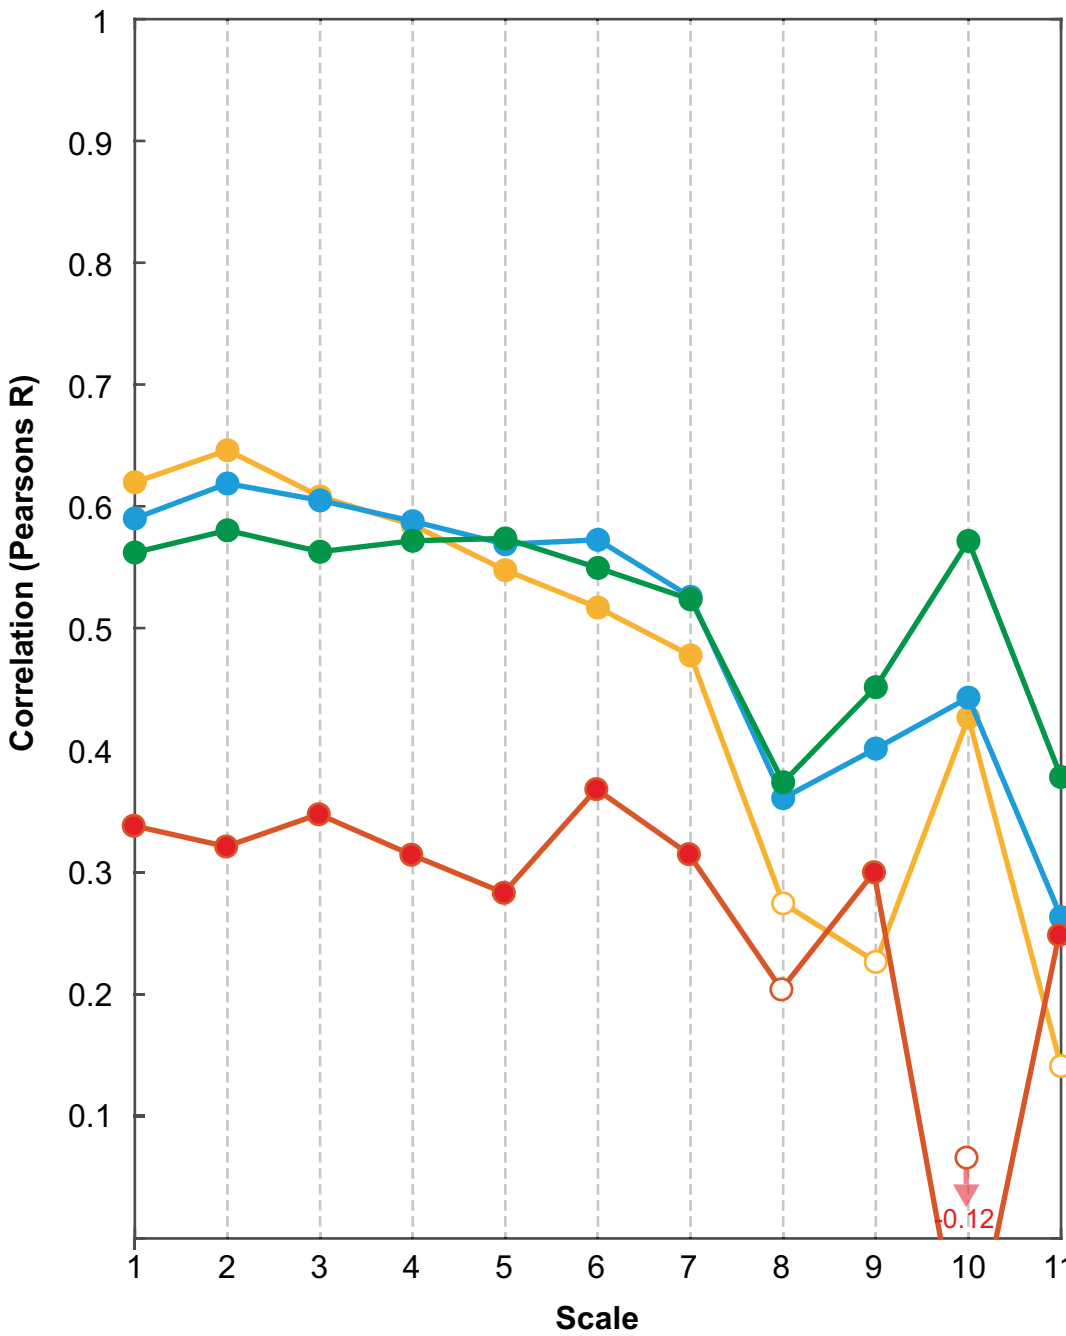

Craddock 200

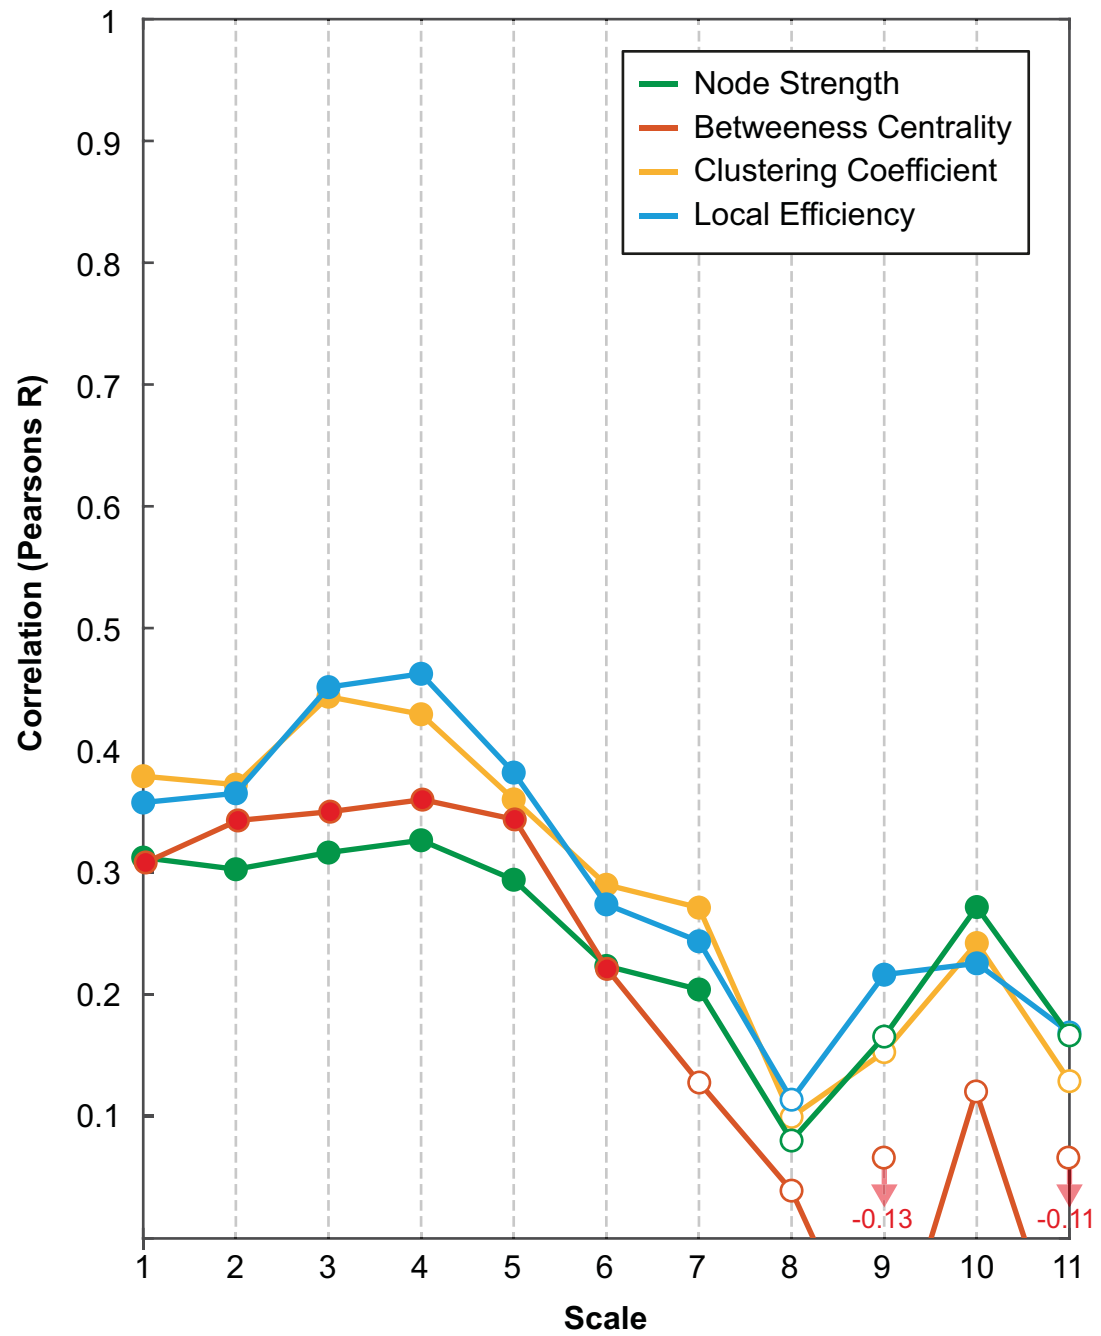

Automated Anatomical Labeling (AAL)

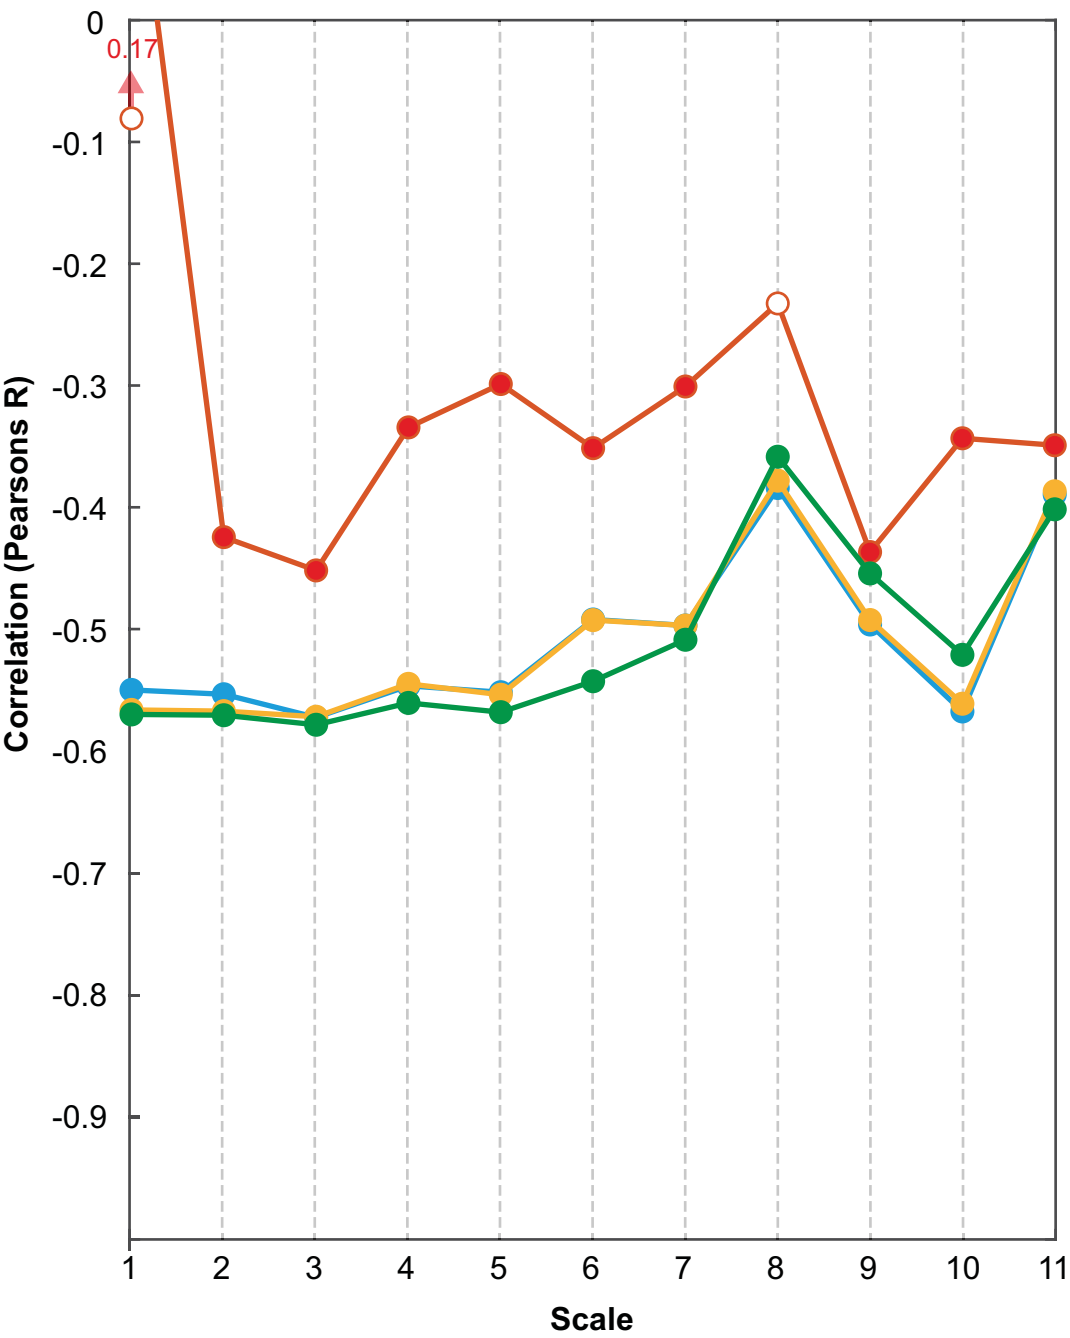

Craddock 200

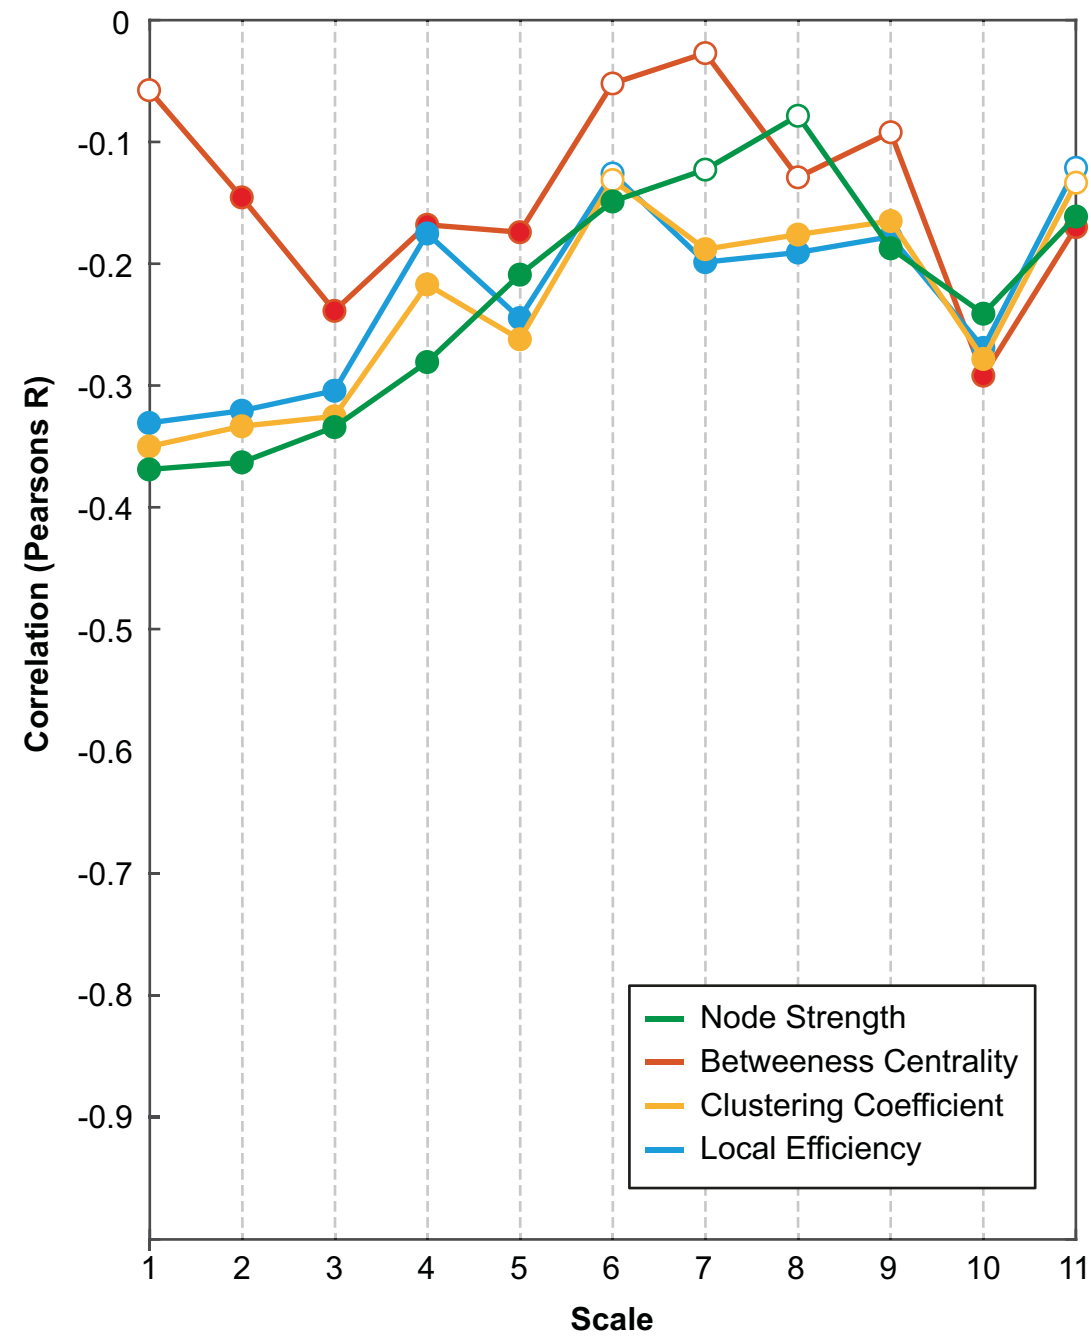

**Strength**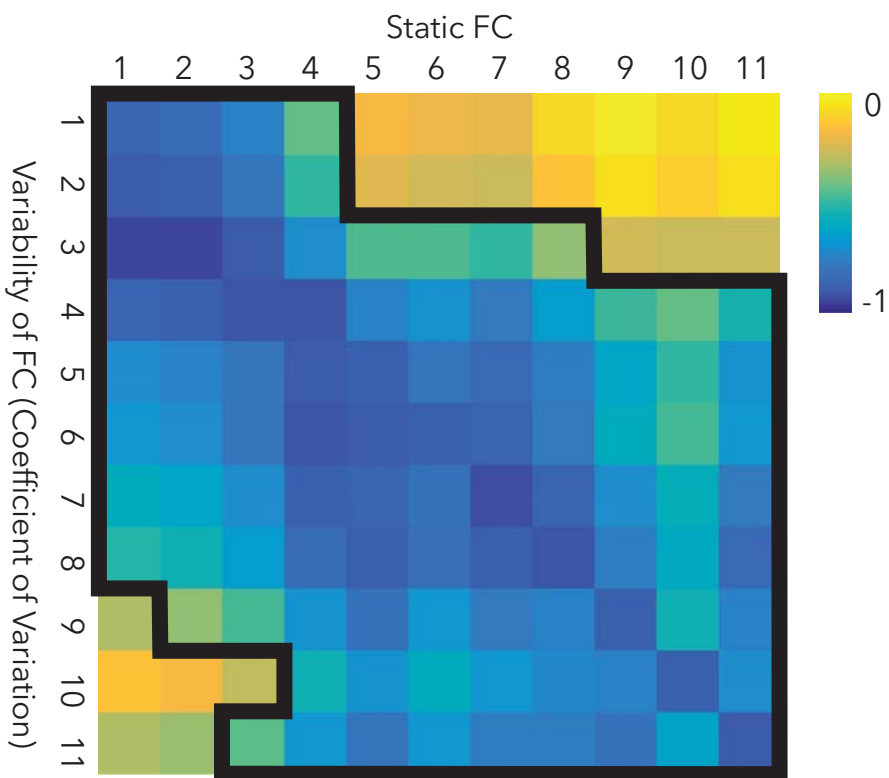**Local Efficiency**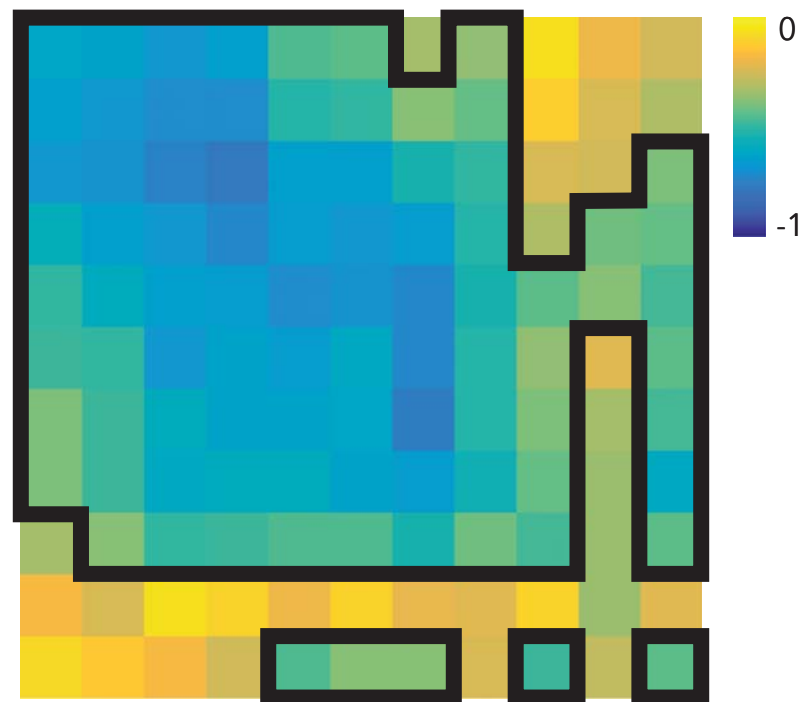**Clustering Coefficient**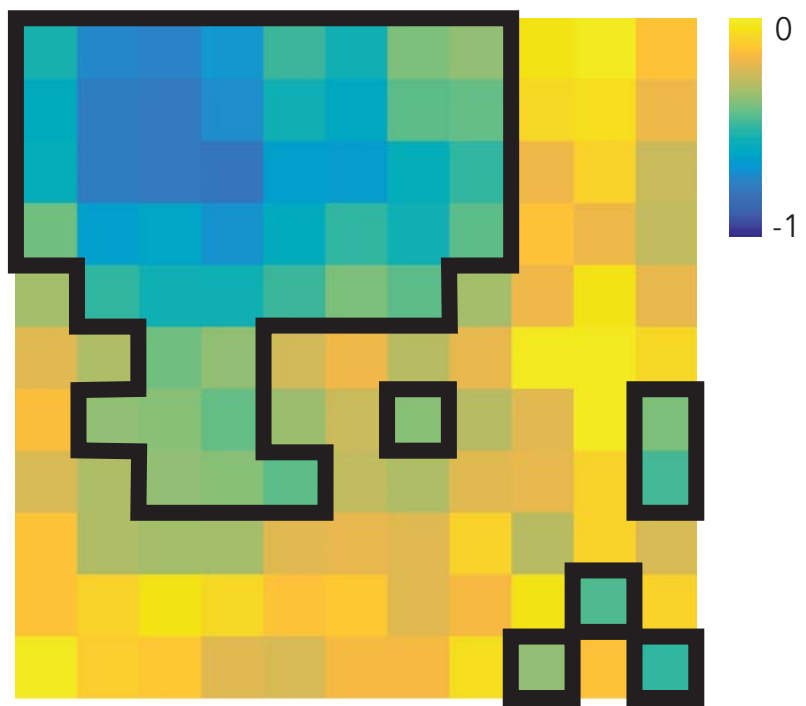**Betweenness Centrality**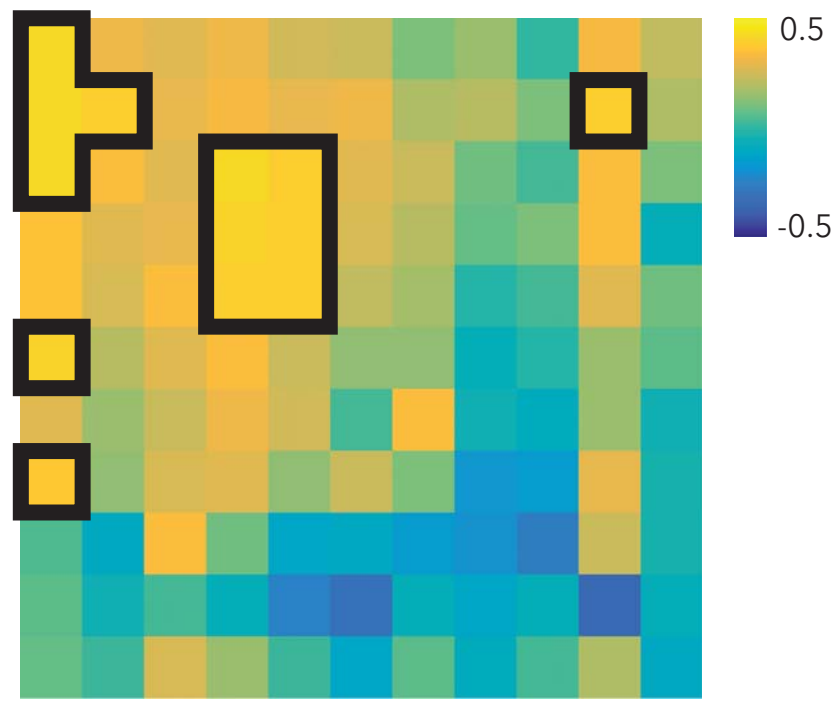

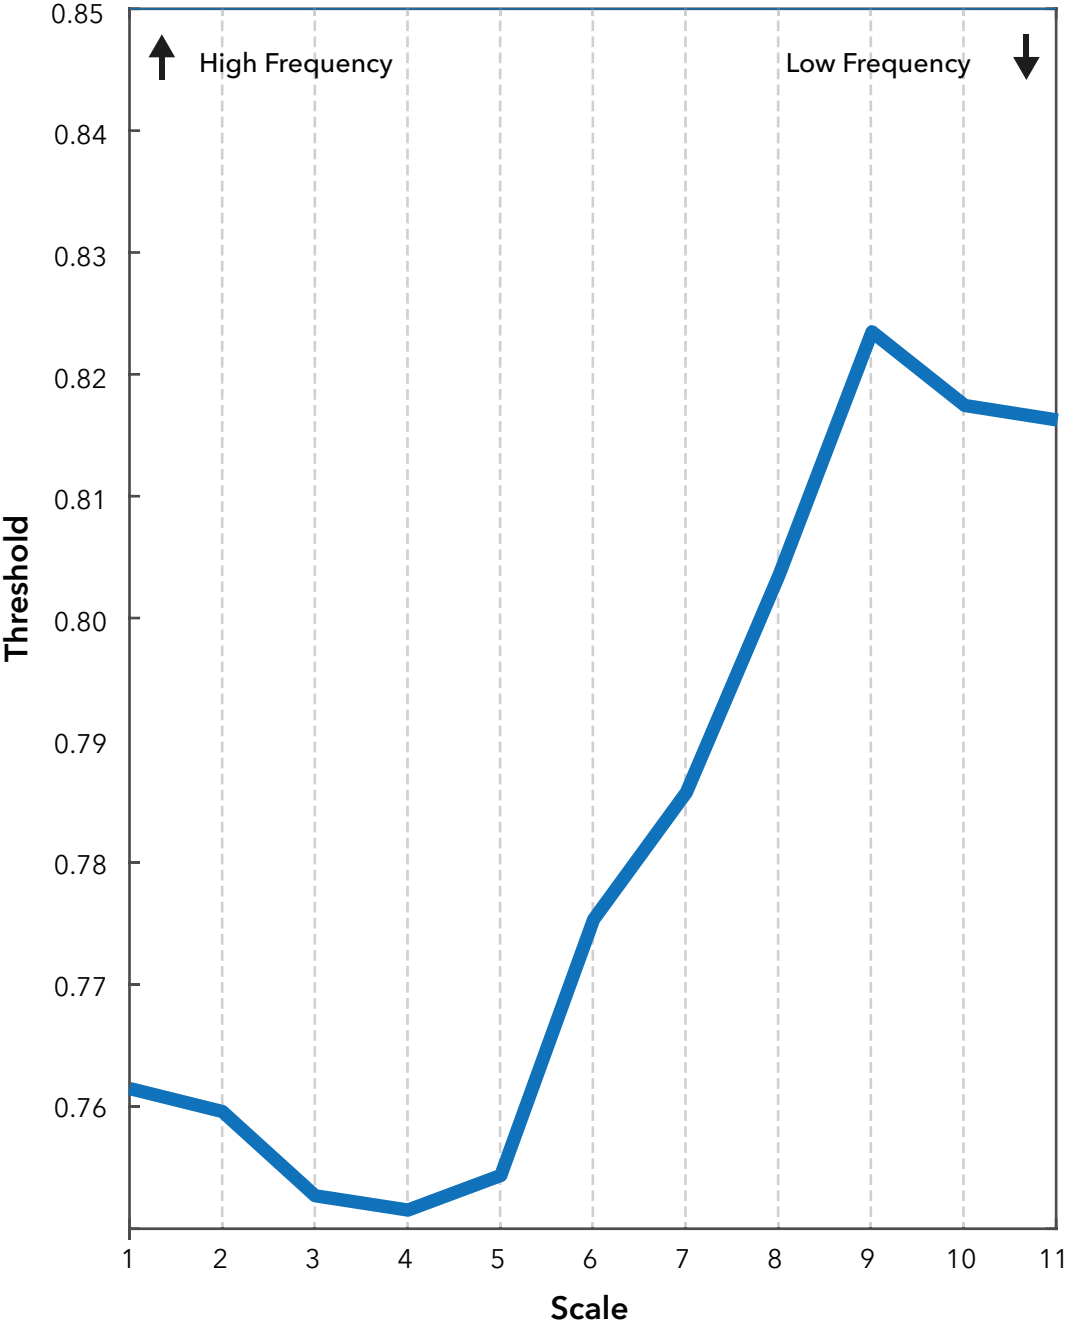

Supplement: mmc1.pdf [file mmc1.pdf]
